# Supplementary material
Source: PubMed Central journal article supplement (PMC3490604)
Supplement: supp_pp.112.201913_201913Supplemental_FigureS1.pdf [file supp_pp.112.201913_201913Supplemental_FigureS1.pdf]

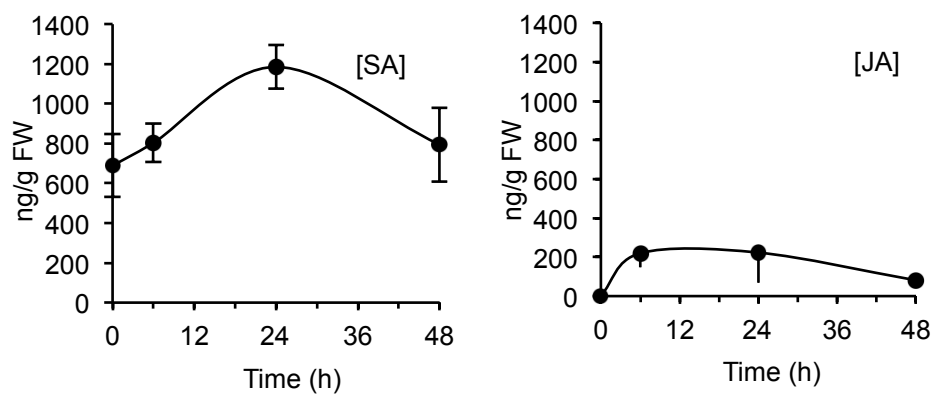

**Figure S1:** RLs induce SA and JA accumulation in Arabidopsis. RLs ( $0.2 \text{ mg.mL}^{-1}$ ) was sprayed onto the leaves. Total SA was extracted from the tissue at the times indicated and analysed by high-performance liquid chromatography. Analysis was performed in duplicate. The zero time point corresponds to SA found in non-treated plants. JA was extracted from the tissues at the times indicated and analyzed by high-performance liquid chromatography followed by gas chromatography mass spectrometry. Analysis was performed in triplicate. The zero time point corresponds to JA found in non-treated plants. Errors bars indicate standard deviation.
