# Supplementary material
Source: PubMed Central journal article supplement (PMC3490604)
Supplement: supp_pp.112.201913_201913Supplemental_FigureS2.pdf [file supp_pp.112.201913_201913Supplemental_FigureS2.pdf]

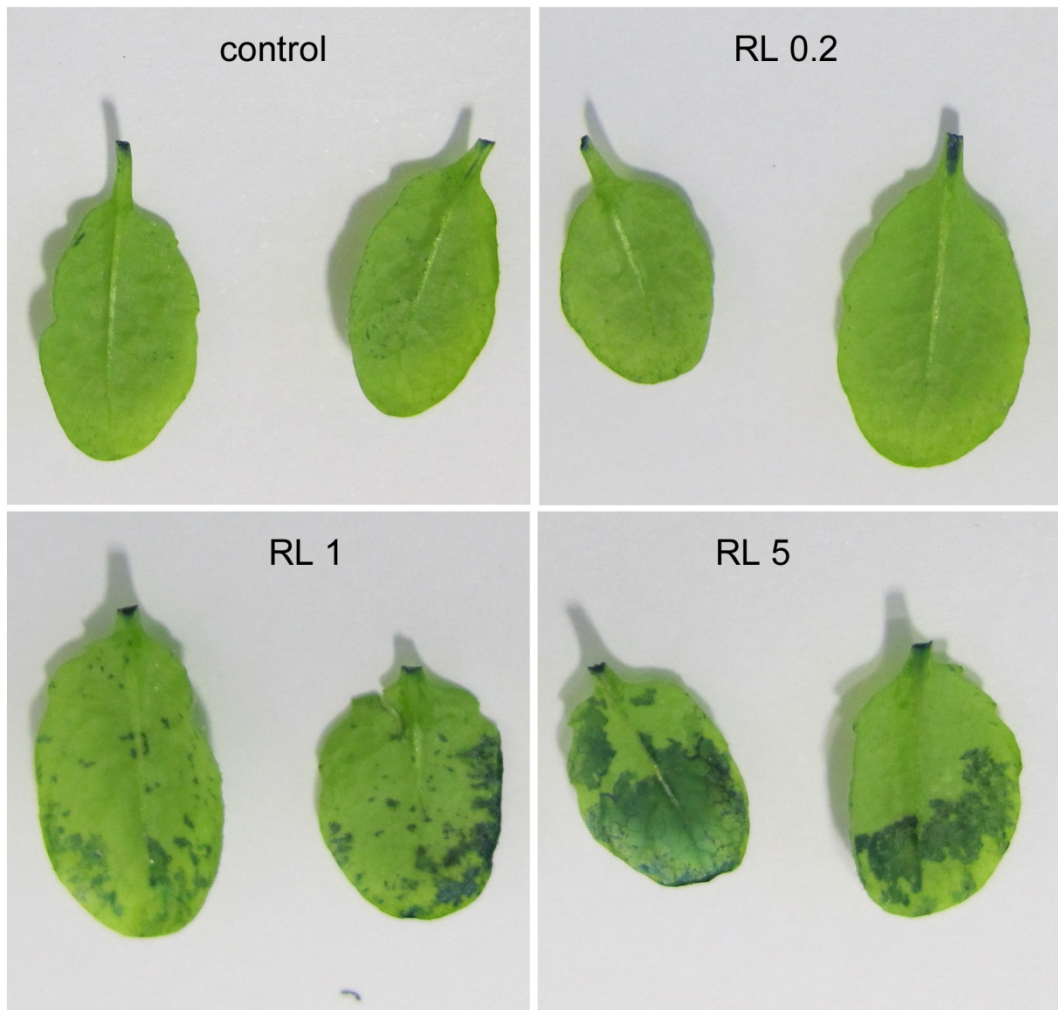

**Figure S2:** RL-induced cell death in Arabidopsis. Leaves from WT plants were treated with 0.2, 1 or 5 mg.mL<sup>-1</sup> of RLs or water (control). After 24 hours, excised leaflets were stained with Evans blue. Dead tissues are visualized by blue color.
