# Supplementary material
Source: PubMed Central journal article supplement (PMC3490604)
Supplement: supp_pp.112.201913_201913Supplemental_FigureS3.pdf [file supp_pp.112.201913_201913Supplemental_FigureS3.pdf]

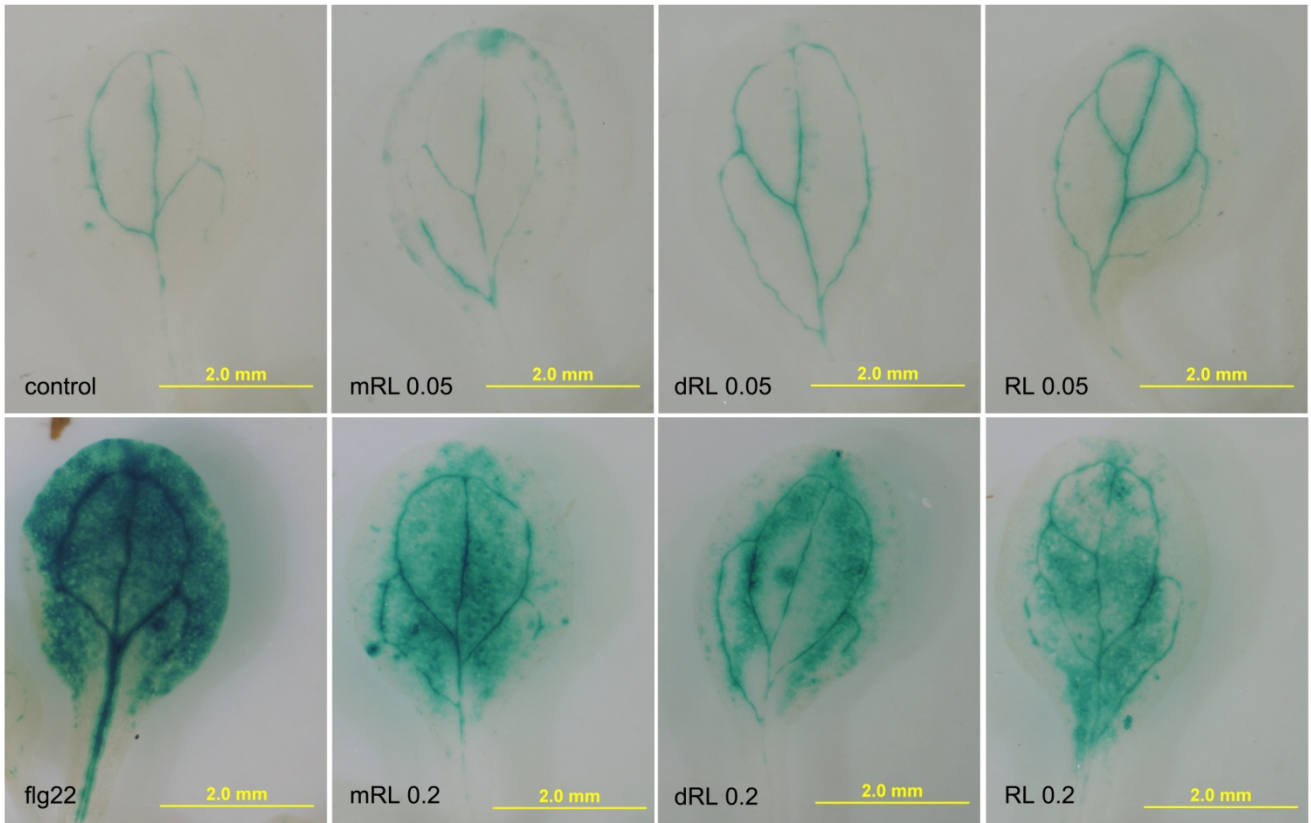

**Figure S3:** Purified mono- and di-RLs induce Arabidopsis defence response. RL-induced expression of *PR1* was assayed in *PR1::GUS* reporter line using flg22 as positive control. Seedlings were treated with 0.05 or 0.2 mg.mL<sup>-1</sup> of mono-RLs (mRL), diRLs (dRL), mix of mono- and di-RLs (RL), 1  $\mu$ M flg22 or water (control). After 24 h, leaves were analyzed for GUS expression.
