# Supplementary material
Source: PubMed Central journal article supplement (PMC3490604)
Supplement: supp_pp.112.201913_201913Supplemental_FigureS4.pdf [file supp_pp.112.201913_201913Supplemental_FigureS4.pdf]

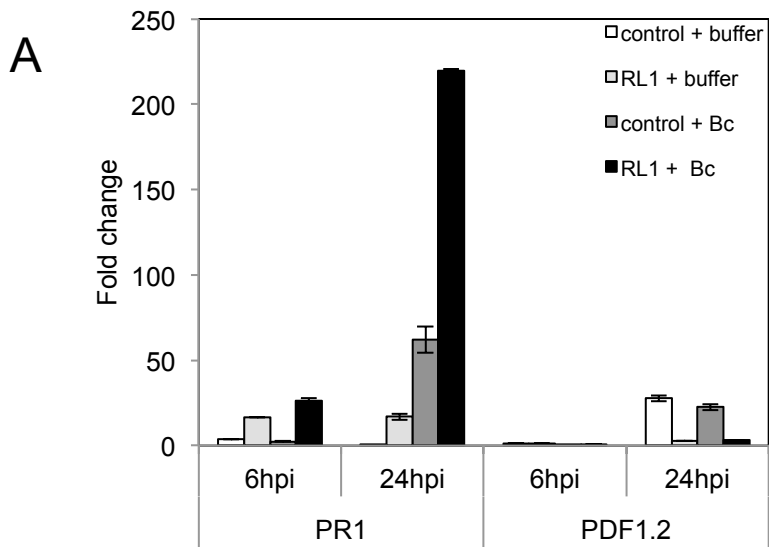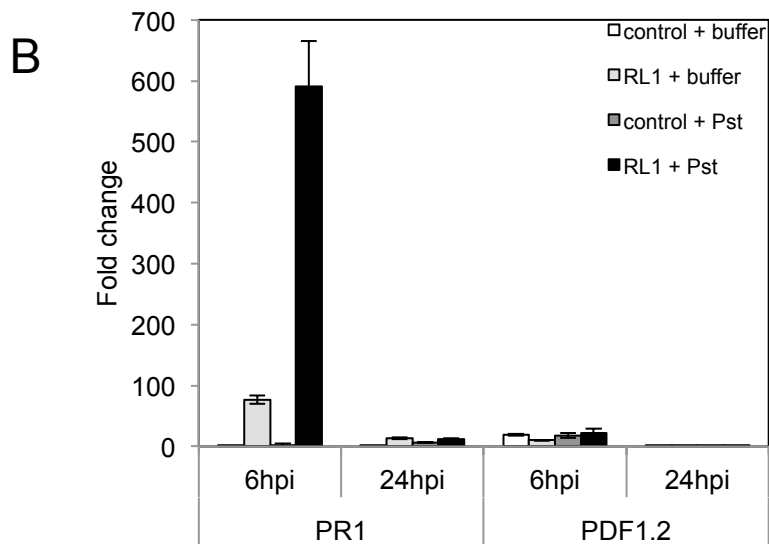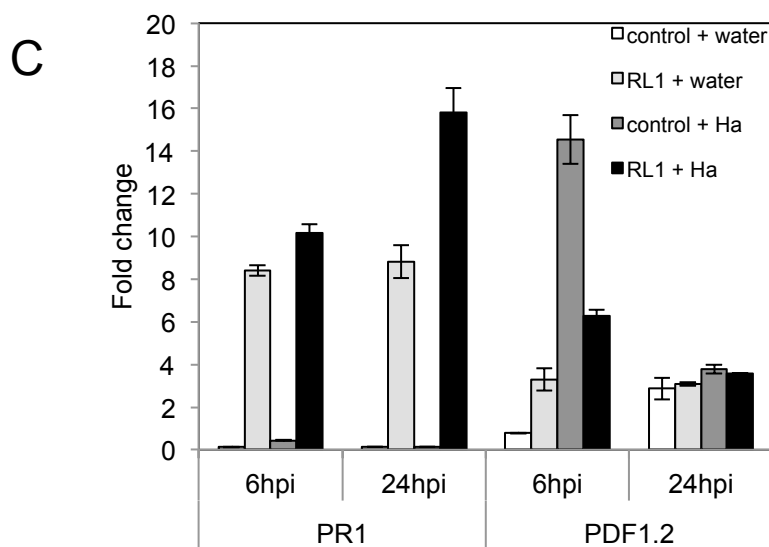

**Figure S4:** RL-mediated potentiation of gene expression after pathogen challenge. Plants were sprayed with 1 mg.mL<sup>-1</sup> RLs or not treated (control) 4 days before inoculation with pathogens or mock inoculation. Transcript accumulation of *PR1* and *PDF1.2* genes was determined by qRT-PCR 6 and 24 hpi with *B. cinerea* (Bc) (A), *Pst DC3000* (Pst) (B) or *H. arabidopsidis* (Ha) (C). Results are expressed as the fold increase in transcript level compared to non-treated leaves just before pathogen inoculation (control 0 hpi). Values shown are means  $\pm$  standard deviation of duplicate data from one representative experiment among three independent repetitions.
