# Supplementary material
Source: PubMed Central journal article supplement (PMC3490604)
Supplement: supp_pp.112.201913_201913Supplemental_FigureS5.pdf [file supp_pp.112.201913_201913Supplemental_FigureS5.pdf]

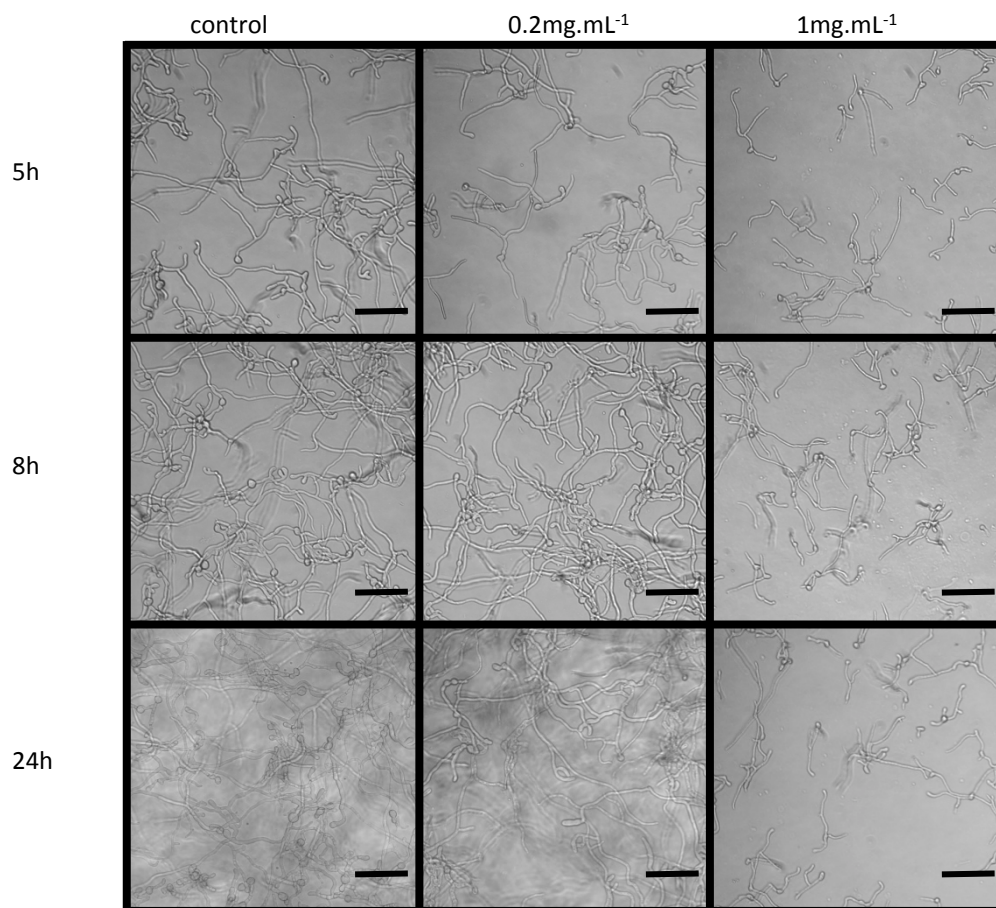

**Figure S5:** Effect of RLs on *Botrytis cinerea* spore germination. Conidia were placed in growth medium supplemented with solutions of RLs at the indicated concentrations. Germ tubes were observed by inverted light microscopy 5, 8 and 24h later. Scale: 50  $\mu$ m.
