# Supplementary material
Source: PubMed Central journal article supplement (PMC3490604)
Supplement: supp_pp.112.201913_201913Supplemental_Table1.pdf [file supp_pp.112.201913_201913Supplemental_Table1.pdf]

Supplemental table 1: Primers sequences used in real time reverse-transcription polymerase chain reaction

| Gene          | Primer sequences                                                      |
|---------------|-----------------------------------------------------------------------|
| <i>PR1</i>    | 5'-AAC TAC GCT GCG AAC ACG TG-3'<br>5'-TCA CTT TGG CAC ATC CGA GTC-3' |
| <i>PDF1.2</i> | 5'-CGC ACC GGC AAT GGT GGA AG-3'<br>5'-CAC ACG ATT TAG CAC CAA AG-3'  |
| <i>PR4</i>    | 5'-AAC AAT GCG GTC AAG GC-3'<br>5'-AAG CAC TCA CGG CTC TCA AAT CCC-3' |
| <i>Actin</i>  | 5'-CCC AGG AAT TGC TGA CCG TA-3'<br>5'-TTT TCT CTC TGG CGG TGC A-3'   |
